# Supplementary material for: Genome-Wide Identification of the Xyloglucan endotransglucosylase/Hydrolase (XTH) and Polygalacturonase (PG) Genes and Characterization of Their Role in Fruit Softening of Sweet Cherry
Source: MDPI journal article supplement (doi:10.3390/ijms222212331), 2021-11-15
Supplement: s1 [file s1]

Supplementary Material

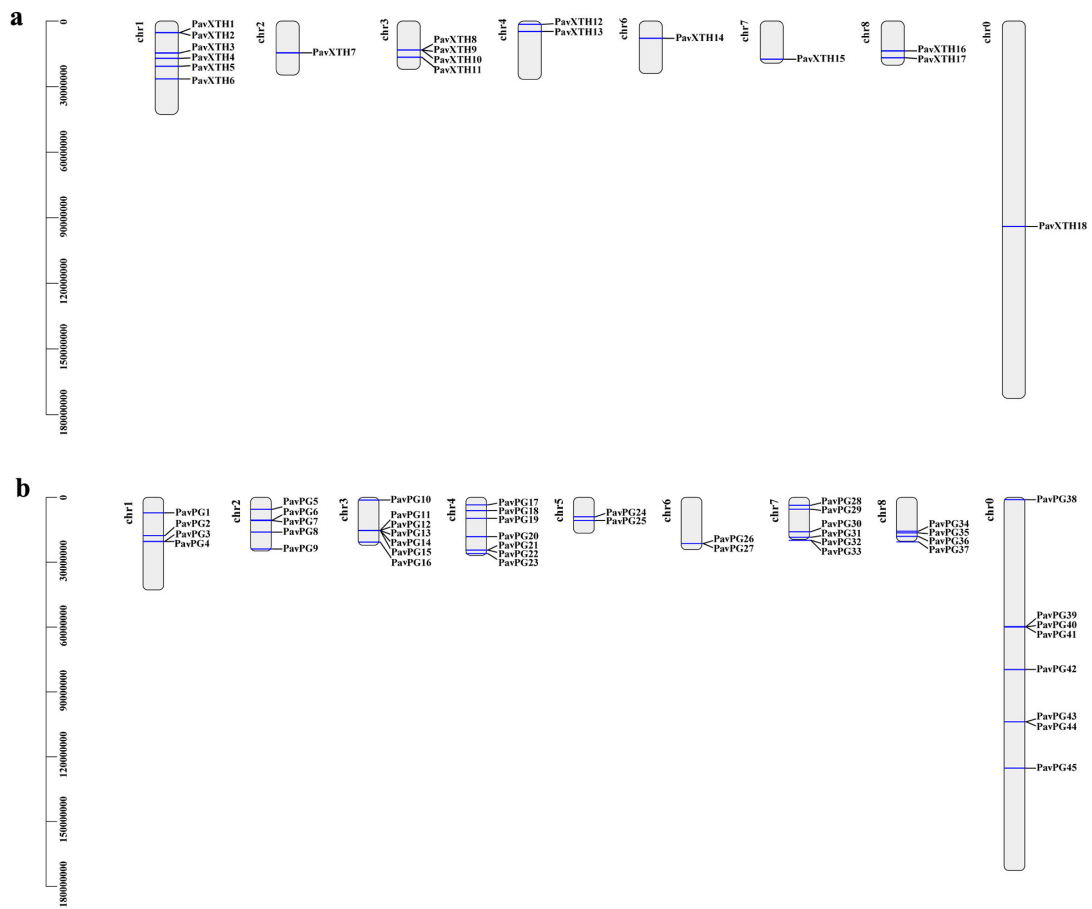

**Figure S1.** Chromosome distribution of sweet cherry *XTH* (a) and *PG* (b) genes. The scale on the left is in megabases (Mb).

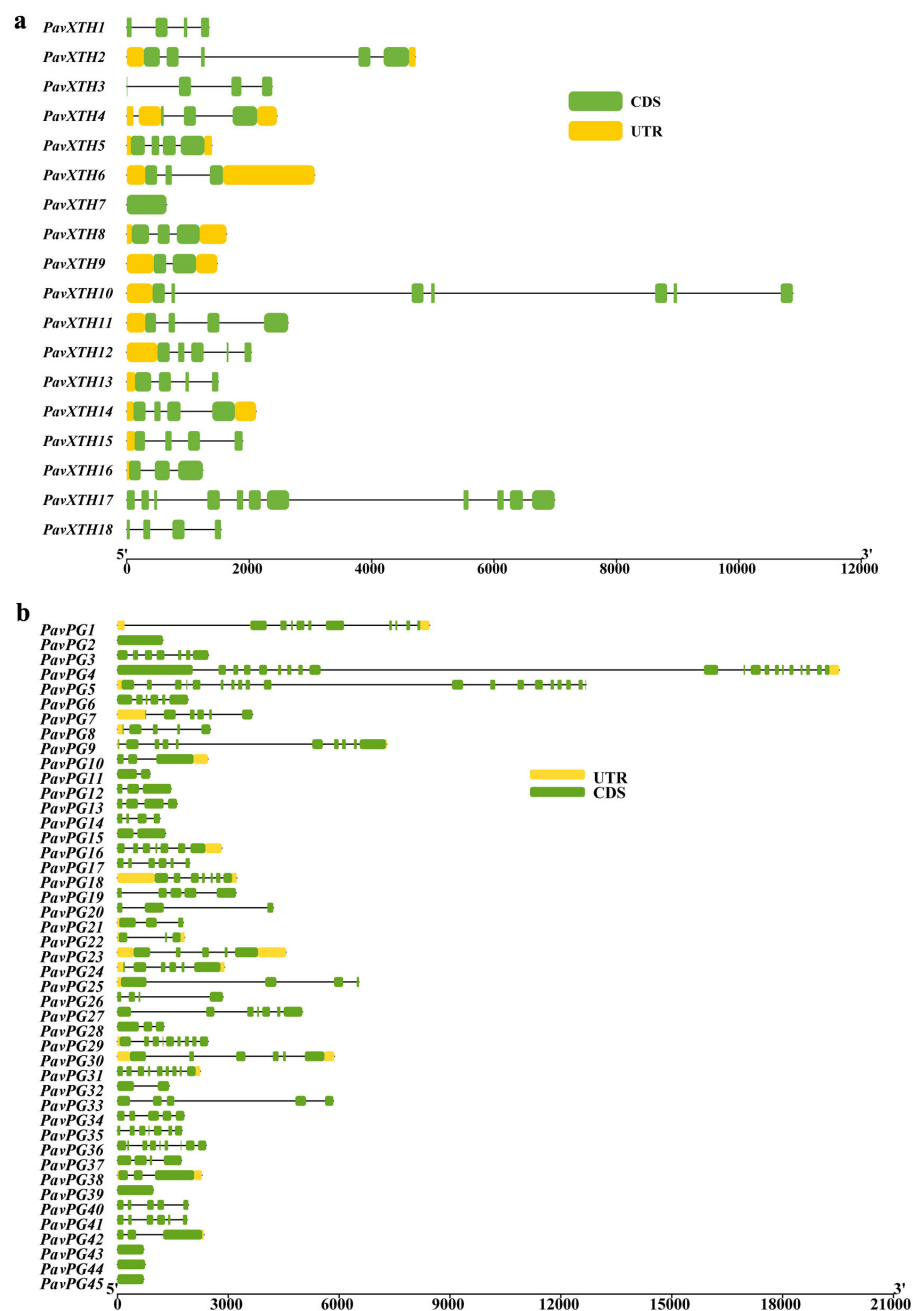

**Figure S2.** Gene structure analysis of sweet cherry *XTH* (a) and *PG* (b) genes.

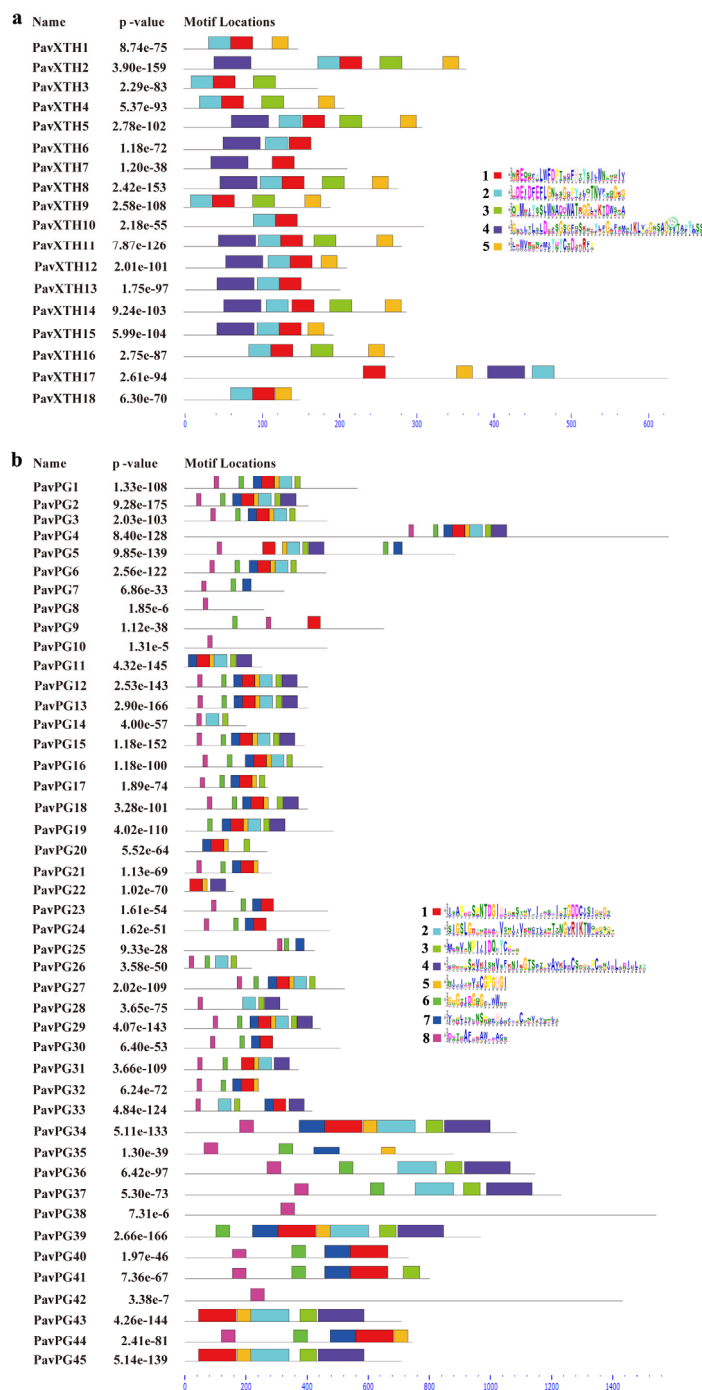

**Figure S3.** Conserved motif analysis of sweet cherry *XTH* (a) and *PG* (b) genes.
